# Supplementary material for: TWAS Atlas: a curated knowledgebase of transcriptome-wide association studies
Source: PubMed Central journal article supplement — Nucleic Acids Res. 2022 Oct 16;51(D1):D1179–87. doi: 10.1093/nar/gkac821 (PMC9825460; doi:10.1093/nar/gkac821), 2022-10-16
Supplement: gkac821_supplemental_file.pdf [file gkac821_supplemental_file.pdf]

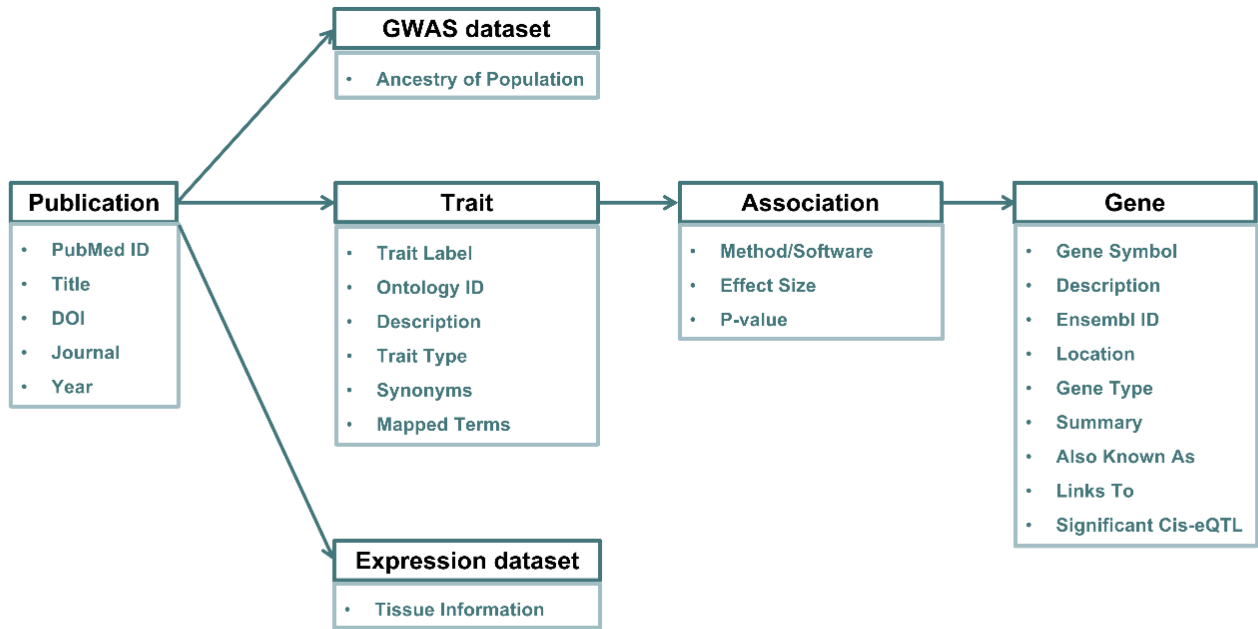

Supplementary Figure S1. An overview of data structure of TWAS Atlas.

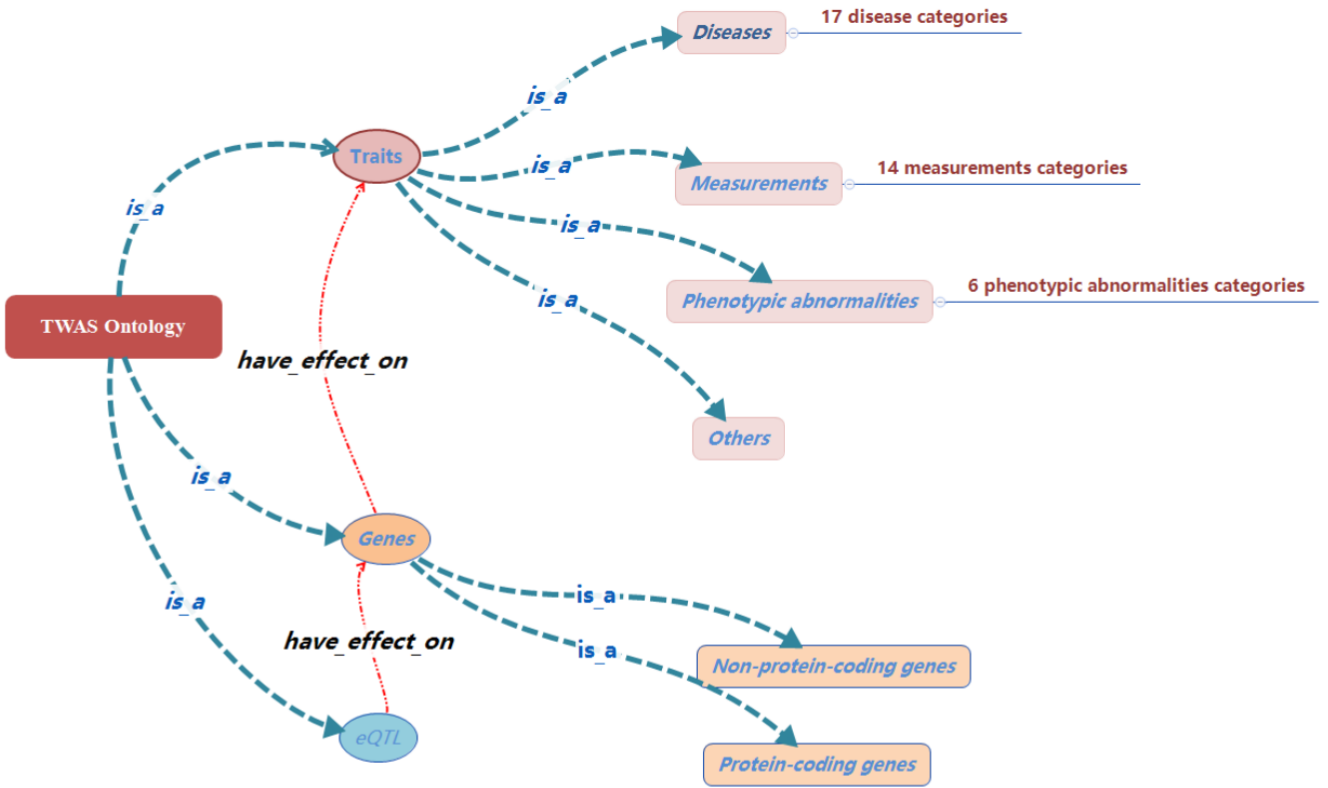

Supplementary Figure S2. TWAS ontology hierarchical structure and key ontological terms.

**Supplementary Table S1.** The number of curated elements for each trait category collected in TWAS Atlas

| <i>Trait categories</i> | <i>Trait subcategories</i>     | <i>#Traits</i> | <i>#Associations</i> | <i>#Genes</i> | <i>#Tissues</i> | <i>#Publications</i> |
|-------------------------|--------------------------------|----------------|----------------------|---------------|-----------------|----------------------|
| Disease                 | cancer                         | 21             | 3095                 | 1351          | 69              | 37                   |
|                         | nervous system disease         | 18             | 14909                | 3972          | 82              | 55                   |
|                         | immune system disease          | 12             | 13159                | 3088          | 61              | 15                   |
|                         | musculoskeletal system disease | 11             | 4764                 | 2668          | 57              | 8                    |
|                         | cardiovascular disease         | 10             | 9052                 | 3243          | 81              | 26                   |
|                         | respiratory system disease     | 10             | 4640                 | 1320          | 62              | 16                   |
|                         | disease of visual system       | 9              | 3751                 | 614           | 49              | 5                    |
|                         | genetic disorder               | 8              | 7118                 | 1132          | 76              | 14                   |
|                         | digestive system disease       | 6              | 11855                | 1389          | 72              | 18                   |
|                         | chronic disease                | 5              | 396                  | 276           | 45              | 7                    |
|                         | endocrine system disease       | 4              | 11547                | 1982          | 65              | 13                   |
|                         | hematologic disease            | 4              | 3437                 | 1475          | 54              | 3                    |
|                         | metabolic disease              | 4              | 544                  | 421           | 53              | 4                    |
|                         | central nervous system disease | 3              | 1016                 | 559           | 64              | 14                   |
|                         | urinary system disease         | 3              | 1241                 | 348           | 61              | 7                    |
|                         | psychiatric disorder           | 1              | 1001                 | 683           | 50              | 8                    |
| other disease           | 9                              | 43002          | 4545                 | 61            | 10              |                      |
| Measurement             | body weights and measures      | 18             | 174294               | 15,907        | 63              | 18                   |
|                         | hematological measurement      | 17             | 22592                | 6500          | 63              | 16                   |
|                         | others measurement             | 14             | 7297                 | 2570          | 66              | 12                   |
|                         | diabetes mellitus              | 5              | 3465                 | 1145          | 55              | 11                   |

|                        |                                                |    |       |      |    |    |
|------------------------|------------------------------------------------|----|-------|------|----|----|
|                        | biomarker                                      |    |       |      |    |    |
|                        | brain measurement                              | 4  | 1667  | 926  | 49 | 5  |
|                        | metabolite measurement                         | 4  | 893   | 355  | 44 | 3  |
|                        | temporal measurement                           | 4  | 5157  | 1556 | 53 | 7  |
|                        | cardiovascular measurement                     | 3  | 6451  | 1522 | 56 | 4  |
|                        | sleep measurement                              | 3  | 1873  | 1263 | 54 | 5  |
|                        | smoking behaviour measurement                  | 3  | 606   | 386  | 42 | 6  |
|                        | bone measurement                               | 2  | 15228 | 1854 | 53 | 8  |
|                        | infectious disease biomarker                   | 2  | 24    | 20   | 2  | 1  |
|                        | pulmonary function measurement                 | 2  | 1298  | 730  | 25 | 2  |
| Phenotypic abnormality | abnormality of connective tissue               | 2  | 11    | 5    | 10 | 1  |
|                        | abnormality of the cardiovascular system       | 2  | 4768  | 1292 | 47 | 3  |
|                        | abnormal inflammatory response                 | 1  | 1401  | 934  | 54 | 3  |
|                        | abnormal of the respiratory system             | 1  | 1     | 1    | 1  | 1  |
|                        | abnormality of blood and blood-forming tissues | 1  | 119   | 78   | 36 | 2  |
|                        | abnormality of head or neck                    | 1  | 47    | 5    | 36 | 1  |
| Others                 | chemical entity                                | 28 | 8002  | 2060 | 67 | 16 |
|                        | material entity                                | 7  | 4485  | 1838 | 61 | 16 |
|                        | vital signs                                    | 6  | 16428 | 3349 | 51 | 7  |

|       |                 |     |        |       |     |     |
|-------|-----------------|-----|--------|-------|-----|-----|
|       | nutrient intake | 4   | 1886   | 469   | 44  | 1   |
|       | process         | 4   | 1785   | 763   | 55  | 5   |
| Total | -               | 257 | 401266 | 22247 | 135 | 200 |
